# Supplementary material for: High-content imaging-based pooled CRISPR screens in mammalian cells
Source: PubMed Central journal article supplement (PMC7821101; doi:10.1083/jcb.202008158), 2021-01-19
Supplement: JCB_202008158_DataS1.pdf [file JCB_202008158_DataS1.pdf]

## Supplementary file 1

### FACS gating strategy of the screen

#### 1. Cell gate and single cell gate

For all FACS experiments, forward versus side scatter (FSC-A vs. SSC-A) gating was used to identify cells of interest based on size and granularity; forward scatter width (FSC-W) vs. forward scatter area (FSC-A) density plot was used to exclude doublets as shown below.

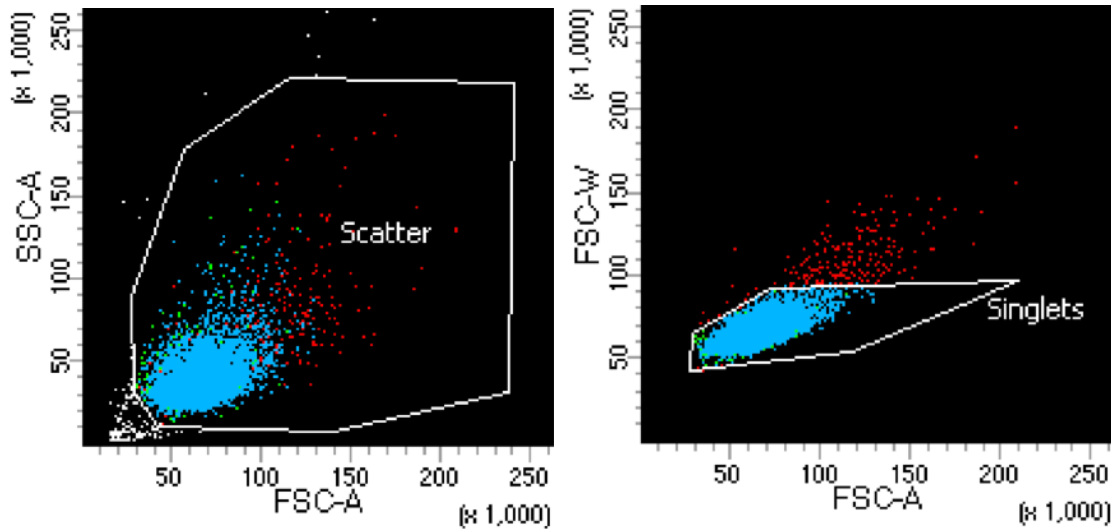

#### 2. sgRNA gate (gate for sgRNA infected cells)

BFP (Pacific Blue-A) vs. GFP (FITC-A) density plot was used to gate H2B-mGFP cells successfully receiving sgRNAs (high BFP high GFP group). For single activation experiment (single activation mIFP proof-of-principle screen and nuclear size screen), unanalyzed samples were collected using sgRNA gate (P2 shown below).

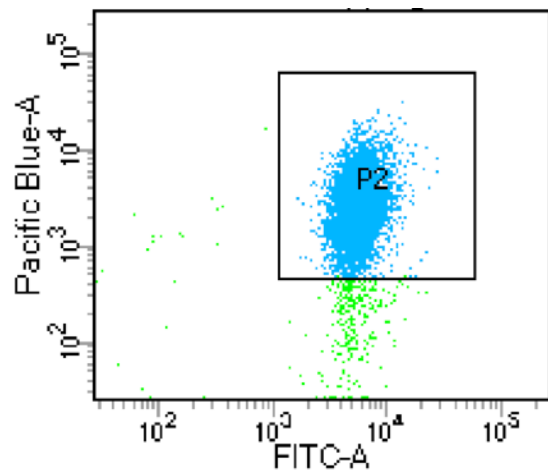

### 3. mCherry gate (gate for different intensity mCherry cells)

mCherry (PE-A) vs. GFP (FITC-A) density plot was used to gate for photo-activated cells. Cells activated with different photo-activation times were used to determine corresponding gates (Examples shown below). Cells in dual-activation experiments were collected with mCherry gates of corresponding photo-activation time.

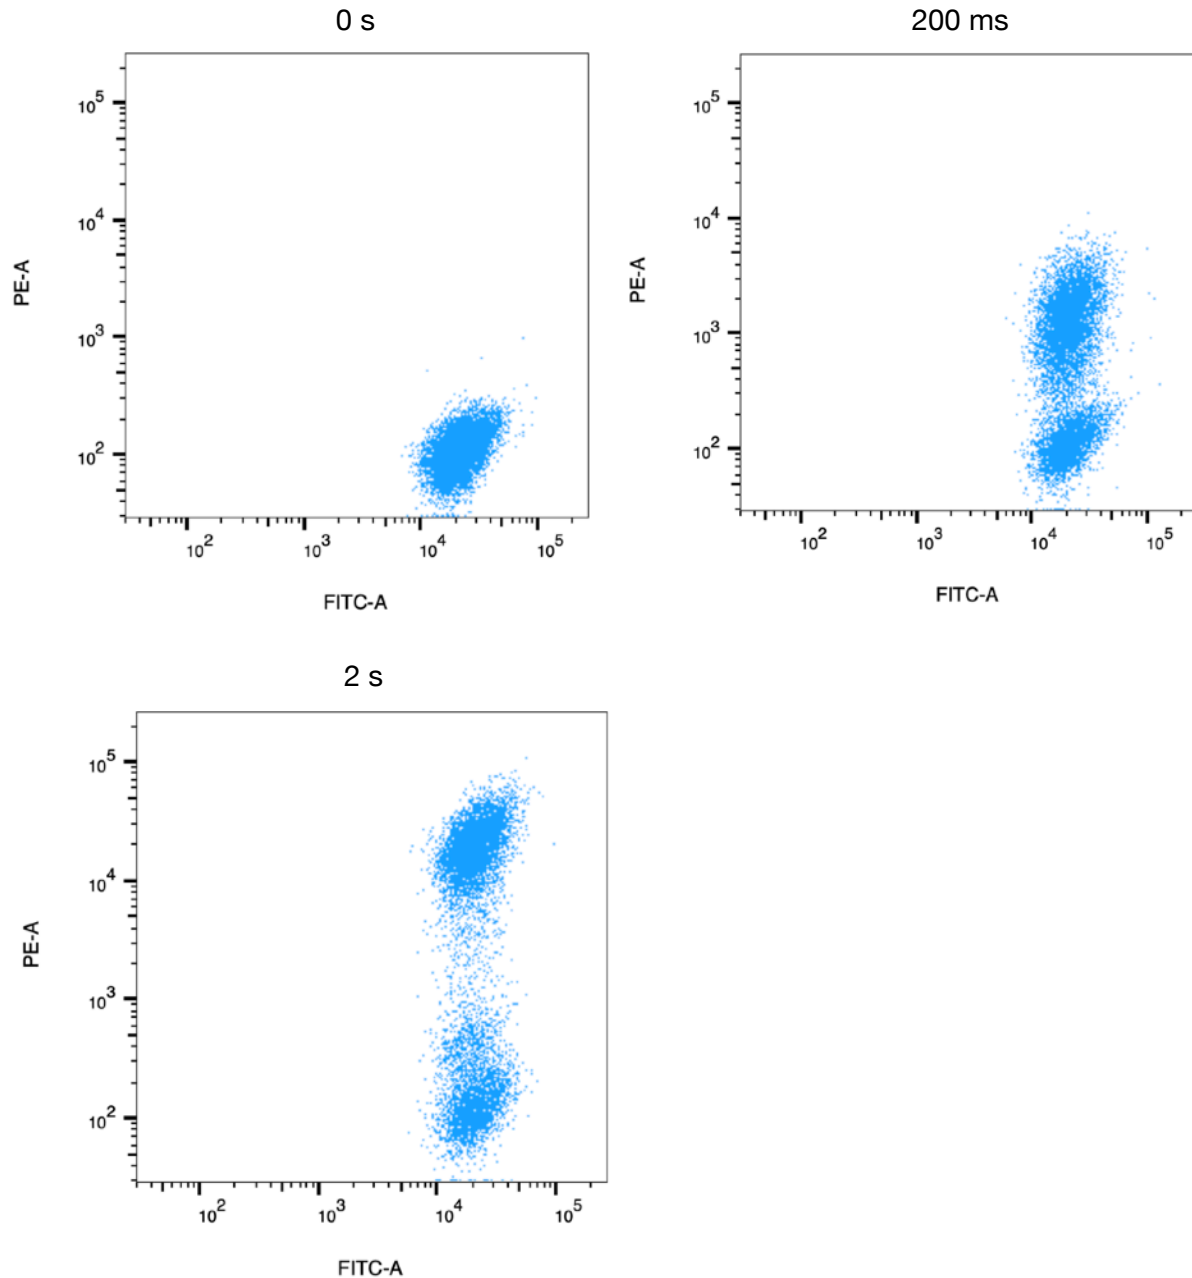

For example, in dual-activation mIFP proof-of-principle screening experiments, three distinct populations were separately sorted based on FITC-A/PE-A:

P5: positively sorted sample (2 s photo-activation)

P4: negatively sorted sample (100 ms photo-activation)  
 P3: unanalyzed sample (0 s photo-activation)

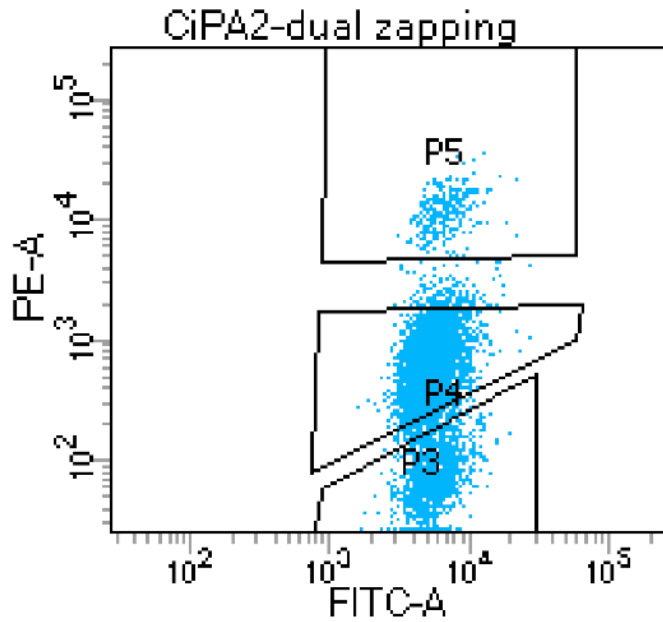

Note: laser and filters used for different channel

| Channel             | Laser         | Filter         | Measured Fluorophore |
|---------------------|---------------|----------------|----------------------|
| <b>Pacific Blue</b> | Violet 407 nm | 450/50         | BFP                  |
| <b>FITC</b>         | Blue 488 nm   | 530/30 - 502LP | GFP                  |
| <b>PE</b>           | Green 561 nm  | 582/15         | mCherry              |
| <b>APC-Cy5.5</b>    | Red 633 nm    | 710/50 - 685LP | mIFP                 |
