# Supplementary material for: High-content imaging-based pooled CRISPR screens in mammalian cells
Source: PubMed Central journal article supplement (PMC7821101; doi:10.1083/jcb.202008158), 2021-01-19
Supplement: JCB_202008158_DataS4.pdf [file JCB_202008158_DataS4.pdf]

## Supplementary file 4

### Plasmid sequences

#### PA-mCherry

cgataccgctgacctcgaggaattaattcgagctcggtagcctttaagaccaatgacttacaaggcagctgtagatcttagccact  
tttaaagaaaaggggggactggaagggctaattcactcccaacgaagacaagatctgcttttgctgtactgggtctctctggtt  
agaccagatctgagcctgggagctctctggctaactagggaaaccactgcttaagcctcaataaagctgccttgagtgttcaag  
tagtgtgtcccgtctgtgtgactctggaactagagatccctcagacccttttagtcagtgtggaaaatctctagcagcatctag  
aattaattccgtgtattctatagtgacctaatacgtatgtgatgatacataagggtatgtattaattgtagccgcttcaacgacaat  
atgtacaagcctaattgtgtagcatctggttactgaagcagaccctatcatctctctgtaaactgccgtcagagtcggtttggtg  
gacgaacctctgagttctggaacgccgtcccgcacccggaaatggtagcgaaccaatcagcagggtcacgctagccag  
atcctctacgccggacgcatctggtccggcatcaccggcgccacaggtgcggttgcgtggcctatacggcagatcaccga  
tggggaagatcgggctcggcactcgggctcatgagcgttgtttcggcgtgggtatggtggcaggccccgtggccgggggact  
gttgggcgccatctccttgcatgcaccattccttgcggcggtgctcaacggcctcaacctactctgggctgttctctaagc  
aggagtgcataaggagagcgtcgaatggtgcactctcagtacaatctagctctgatgccgcatagtaagccagccccgaca  
cccgcaacacccgctgacgcgccctgacgggttctgctcccggcatccgctacagacaagctgtgaccgtctccggga  
gctgcatgtgcagagttttaccgctcatcaccgaaacgcgcgagacgaaagggcctcgtgatacgcctatTTTTataggttaag  
tcatgataataatggtttcttagacgtcaggtggcacttttcgggaaatgtgcgcggaaccctatttgtttttctaaatacattc  
aaatagtatccgctcatgagacaataaccctgataaatgctcaataatattgaaaaaggaagagtatgagtattcaacatttccgt  
gtcgccttattccctttttgcggcattttgccttctgttttctcaccagaaacgctggtgaaagtaaaagatgctgaagatcag  
ttgggtgcacgagtggttacatcgaactggatctcaacagcggtaagatccttgagagtttgcccccgaagaacgttttccaatg  
atgagcacttttaaagttctgctatgtggcggttattatcccgtattgacgccgggcaagagcaactcggctcggcagatacactat  
tctcagaatgacttggttgagtactaccagtcacagaaaagcatcttacggatggcatgacagtaagagaattatgcagtgtctgc  
cataaccatgagtataaacctgcggccaacttactctgacaacgatcggaggaccgaaggagtaaccgctttttgcacaac  
atgggggatcatgtaactgccttgatcgttgggaaccggagctgaatgaagccatacacaacgacgagcgtgacaccacgat  
gcctgtgacaatggcaacaacgttgcgcaactattaactggcgaactacttactctagcttcccggcaacaattaatagactgga  
tggaggcggataaaagttgcaggaccacttctgcgctcggccctccggctggctggttattgctgataaatctggagccggtgag  
cgtgggtctcgcggtatcattgcagcactggggccagatggttaagccctcccgtatcgtagtattctacacgacggggagtcagg  
caactatggatgaacgaaatagacagatcgtgagatagggtgcctcactgattaagcattggttaactgtcagaccaagtttactcat  
ataacttttagattgattaaaacttatttttaatttaaaaggatctaggtgaagatccttttgataatctcatgacaaaaatccctaac  
gtgagttttcgttccactgagcgtcagaccccgtagaaaagatcaaaggatcttcttgagatcctttttctgcgcgtaactctgctgct  
tgcaaacaaaaaacaccgctaccagcgggtggtttgttgcggatcaagagctaccaactcttttccgaaggtaactggcttc  
agcagagcgcagatacacaactgtcctctagtgtagccgtagttaggccaccactcaagaactctgtagcaccgcctacat  
acctcgtctgctaactcctgttaccagtggctgctccagtgataagctgcttaccgggttgactcaagacgatagttac  
cggataaggcgcagcggctcgggtgaacggggggttctgtgcacacagcccagcttgagcgaacgacctacaccgaactga  
gatacctacagcgtgagctatgagaaagcggcagcttcccgaaggagaaagcggacaggtatccggtaagcggcaggg  
tcggaacaggagagcgcagagggttccaggggaaacgcctggtatctttatagctctgctgggttccggcactctgact  
tgagcgtcgattttgtgatgctcgtcagggggcgagcctatggaaaaacgccagcaacgcggccttttaccggttctggcct  
tttgcgtggcctttgctcacatgttcttctcgttaccctgattctgtggataaccgtattaccgccttgagttagctgataaccgct  
cgccgcagccgaacgaccgagcgcagcagtgagcaggaagcgggaagagcgccaatacgcacaaccgcctctcc  
ccgcgcttggccgattcattatgtagctgtggaatgtgtgtagttagggtgtggaaagtcccagggctcccagcaggcaga  
agatgcaaaagcatgcatctcaattagtcagcaaccaggtgtggaaagtcccaggtcccagcaggcagaagatgcaaaag  
catgcatctcaattagtcagcaaccatagtcggcccttaactccgcccataactccgcccagttccgcccattct  
ccgccccatggctgactaatttttttattatgtagaggccgaggccgcctcggcctctgagctattccagaagtagtgaggaggc  
tttttgaggcctaggcttttgcaaaagcgttgacacaagacaggcttgcgagatatggttgagaataccactttatcccgcgtca  
gggagaggcagtgctgtaaaaagacgcggactcatgtgaaatactggttttagtgcgccagatctataatctcgcgcaacctat  
ttcccctcgaacacttttaagccgtagataaacaggctgggacactcacatgagcgaataacatcgtcacctgggacatggt  
gcagatccatgcacgtaaacctgcaagccgactgatgccttctgaacaatgaaagcattattgcccgaagccgtggcggctg  
taccgggtgcgttactggcgcgtgaactgggtattcgtcatgtcgataaccgtttgtatttccagctacgatcacgacaaccagcgcg  
agcttaaagtgtgaaacgcgcagaaaggcagtgaggcgaaggctcatcgttattgatgacctggtggataaccggtggtactgcggt  
tgcgattcgtgaaatgtatccaaaagcgcactttgtcaccatcttcgaaaaccggctggtcgtccgctggtgatgactatgtgtt  
gatatcccgcaagatacctggattgaacagccgtgggatatggcgtcgtattcgtcccgcaatctccggtcgtactatctttcaa

cgctggcactgccggcggtgtcttttaacttcaggcgggttacaatagttccagtaagtattctggaggctgcacatccatgaca  
caggcaaacctgagcgaaacctgttcaaacccccgtttaaacatcctgaaacctcgacgctagtcggccgcttaacacggc  
gcacaaccgcctgtgcagtcggcccttgatggtaaaaccatccctactggatcgcacatgattaaccgctgatgtggatctggc  
cggcattgaccacgcgaaatcctcagcgtccaggcacgtattgtgatgagcgtgccgaacgtaccgacgatgattatcacg  
acggtgattggctaccgtggcggcaactggattatgagtgggccccggatctttgtgaaggaaccttactctgtggtgtgacata  
attggacaaactacctacagagattaaagctctaaggtaataaaaattttaagtgataatgtgtaaactactgattctaattggtt  
gtgtattttgattccaacatggaactgatgaatgggagcagtggtggaatgccttaatgaggaaaacctgtttgctcagaaga  
aatgccatctagtgatgatgaggctactgctgactctcaacattctactcctcaaaaaagaagagaaaggtagaagaccccaag  
gactttcctcagaattgctaagttttgagtcagctgtgttttagtaatagaactcttgcttgccttgcatttacaccacaaaggaaa  
agctgcactgctatacaagaaaattatggaaaaatattctgtaacctttataagtaggcataacagttataatcataactactgttttt  
cttactccacacaggcatagagtgtctgtatataactatgctcaaaaattgtgtacctttagcttttaattgtaaaggggtaata  
aggaatatttgatgatagtgcttgcactagagatcataatcagccataccacattgtagagggtttactgtttaaaaaacctcca  
cacctccccctgaacctgaaacataaaatgaatgcaattgtgtgtaactgtttattgcagcttataatggttacaataaagcaat  
agcatcacaatttcacaaataaagcatttttctactgcattctagtgtgtgttgcctcaaacatcaatgatcttatcatgctggat  
caactggataactcaagtaaccaaataatcccaaacctcccacccataccctattaccactgccaattacctagtggtttcatt  
actctaaacctgtgattcctctgaattatttcattttaagaaattgtattgttaaatgtactacaaacttagtagttggaagggctaa  
ttactcccaagaagacaagatattcctgatctgtggatctaccacacacaaggctactcctgattagcagaactacacacca  
gggcccagggtcagatattcactgacctttggatggtgctacaagctagtaccagttgagccagataaggtagaagaggccaat  
aaaggagagaacaccagctgttacacctgtgagcctgcatgggatggatgacccggagagagaagtgttagagtgagggtt  
gacagccgcttagcattcatcagctggccgagagctgcatccggagcttcaagaactgctgatacagagcttgcataag  
gactttccgctgggactttccagggagcgtggcctgggcccggactggggagtggcgagccctcagatctcgcataaagca  
gctgcttttgcctgactgggtctctggttagaccagatctgagcctgggagctctctggctaactaggaacccactgcttaag  
cctcaataaagctgccttgagtgctcaagtagtggtgcccgtctgtgtgactctgtaactagagatccctcagacccttta  
gtcagtggtgaaaatctctagcagtgccgcccgaacagggacttgaagcgaagggaaaccagaggagctctcgcagcga  
ggactcggctgctgaagcgcgcacggcaagaggcgagggggcggcagctggtgagtagccaaaaatttgactagcggag  
gctagaaggagagagatgggtgagagcgtcagtagtaagcgggggagaattagatcgcgatgggaaaaattcggttaagg  
ccagggggaaagaaaaataaaattaaacataatagtagggcaagcagggagctagaacgattcgcagtaaatcctggcctg  
ttagaacatcagaaggctgtagacaaatactgggacagctacaacctccctcagacaggatcagaagaacttagatcattat  
ataatacagtagcaaccctctattgtgtgcatcaaggatagagataaaagacaccaaggaagccttagacaagatagaggaag  
agcaaaaacaaagtaagaccaccgcacagcaagcggccggtgatcttcagacctggacgatataataggggacaattggag  
aagtgaattataataataaagtagtaaaaattgaaccattaggagtagcaccaccaaggcaagagaagagtggtgcagag  
agaaaaagagcagtggaataggagctttgttcttgggtcttgggagcagcaggaagcactatgggcgcagcgtcaatgac  
gctgacggtacaggccagacaattattgtctggtatagtcagcagcagaacaatttgcagggctattgaggcgaacacgcat  
ctgttgaactcacagctctggggcatcaagcagctccaggcaagaatcctggctgtgaaagatacctaaaggatcaacagctc  
ctgggatttggggtgctctggaaaaactcattgcaccactgctgtgccttggatgctagtggagtaataatctctggaacaga  
ttggaatcacacgacctggatggagtgggacagagaaattaacaattacacaagcttaatacactccttaattgaagaatcgcaa  
aaccagcaagaaaagaatgaacaagaattattggaattagataaatgggcaagtttgggaattggttaacataacaaattggct  
gtggtatataaaattattcataatgatagtaggaggttggtagggttaagaatagttttgctgtactttctatagtaatagagttaggc  
agggatattcaccattatcgttccagaccacctccaaccccgaggggacccgacaggcccgaaggaatagaagaagaagg  
tgagagagagacagagacagatccattcgattagtgaacggatctcagcggctgccaatggcagttatccacaattttaa  
aagaaaaggggggattgggggtacagtcaggggaaagaatagtagacataatagcaacagacatacaactaaagaatta  
caaaaacaaattacaaaaattcaaaaatttccgggttattacagggacagcagagatccagttggatcgataagcttgatcgaat  
tctcgcagccccgataaaaataaagattttatttagtctccagaaaaaggggggaatgaaagacccacctgtaggttggcaag  
ctagctgcagtaacgccattttgcaaggcatggaaaaataccaaaccaagaatagagaagttcagatcaagggcgggtacatg  
aaaatagctaacgttgggcaaacaggatattcgcggtgagcagtttccggccccggccccggggccaagaacagatggtcacc  
gcagttcggccccggccccgaggccaagaacagatggtcccagatattggccaacctcagcagtttctaagaccatcag  
atgttccaggctcccccaaggacctgaaatgacctgcccctatttgaattaaccaatcagcctgcttctcgttctgttcgctg  
cttctgctccccgagctctataaaagagctcacaaccctcactcggcgcgcccagctcctccgacagactgagtcgccccgggg  
ggatctggagctctcgagaattctcacgctctgcaggatcaagcttgcggtaccgcccgggggacccgggtcggccac  
catggtgagcaagggcgaggaggataacatggccatcattaaggagttcatgcttcaaggtgcacatggaggggtccgtga  
acggccacgtgttcgagatcgagggcgagggcgagggcccggccctacgagggcaccagaccgccaagctgaaggtgacc  
aaggggtggccccctgccctcactgggacatcctgtcccctcaattcatgtacggctccaatgcctacgtgaagcaccggcc  
gacatccccgactacttaagctgtccttccccgagggctcaagtgggagcgcgtgatgaaattcgaggacggcggcgtggtg  
accgtgaccaggactcctccctgcaggacggtgagttcatctacaaggtgaagctgcgcccaccaactcccctccgacgg

ccccgtaatgcagaagaagaccatgggctgggaggccctctccgagcggatgtaccccgaggacggcgccctgaagggcg  
aggtaagccgagagtgaaagtgaaggacggcgccactacgacgctgaggtcaagaccacctaaggccaagaagccc  
gtgcagctgccggcgctacaacgtcaaccgcaagttggacacacctcacacaacgaggactacaccatcgtggaacagt  
acgaacgtgccgagggccgcccactccaccggcgcatggacgagctgtacaagggaagtgaagcggtagcggctcaggt  
agtgaagtccaagaagaagcgcaaggtgtaaagcggcggcactctagagtcgacctgcaggcatgcaagcttgataca  
agcttatcgataatcaacctctggattacaaaattgtgaaagattgactggtattcctaactatgttgctcctttacgctatggtgatac  
gctgcttaatgcctttgtatcatgctattgcttccgctatggctttcattttcctcctgtataaatcctgggtgctgctctttatgagga  
ggtgtggcccgtgtcaggcaacgtggcgtggtgtgactgtgtttgtgacgcaacccccactggtggggcattgccaccacct  
gtcagctcctttccgggactttcgctttccccctccctattgccacggcggaactcatcgccgctgcttggccgctgctggaca  
ggggctcggctgtgggactgacaattccgtggtgtgtcggggaaatcatcgtcctttcctggctgctcggctgtgtggcacct  
ggattctgcgcccggacgtccttctgctacgtccctcggccctcaatccagcggaccttcttcccgggcctgctgccggctctg  
cggcctctccgcttccgcttccgctcagacgagtcggatctcccttggggcggcctccccgcat

## H2B-mGFP

attaattccgtgtattctatagtgacctaataatcgatgtgtatgatacataaggttatgtattaattgtagccgcttctaacgacaata  
tgtacaagcctaattgtgtagcatctggcttactgaagcagaccctatcatctctcgtaaactgccgcagagtcggtttgggtgg  
acgaaccttctgagttctggtaacgccgtcccgacccggaaatggcagcgaaccaatcagcagggctcatcgtagccagat  
cctctacgccggacgcatcgtggccggcatcaccggcgccacaggtgctgggtgctggcgcctatatcgccgacatcaccgatg  
gggaagatcgggctgccacttccggctcatgagcgttgtttcggcggtgggtatggtggcaggccccgtggccgggggactgt  
tggcgccatctccttgcagcaccattccttggcgggcggtgctcaacggcctcaactactactgggtgcttctaatacgag  
gagtcgcataaggagagcgtcgaatggtgactctcagtaaatctagctctgatgccgcatagtaagccagccccgacacc  
cgccaacacccgctgacgcgccctgacgggcttctgctcggcgatccgcttacagacaagctgtgaccgctcggggagc  
tgcagtgctcagaggtttaccgctcatcaccgaaacgcgagacgaaagggcctcgtgatacgcctatatttataggttaatgct  
atgataataatggtttctagacgtcaggtggcactttcggggaaatgtgcgccaacccctattgtttatatttctaatacattcaa  
atatgtatccgctcatgagacaataaccctgataaatgctcaataatattgaaaaaggaagagatgagattcaacatttccgtgt  
cgccctattcccttttgcggcattttgcttctgcttttgcacccagaaacgctggtgaaagttaaagatgctgaagatcagtt  
gggtgcagagtggttacatgaactggatctcaacagcggtaagatccttgagagtttgcggccgaagaacgtttccaatga  
tgagcacttttaagttctgctatgtggcggttattatccgctattgacgcccggcaagagcaactcggtcgcccgcatacactatt  
ctcagaatgacttgggtgagactcaccagtcacagaaaagcattctacggatggcatgacagtaagagaattatgcagtgctgccc  
ataaccatgagtgataaactgcccgaacttacttctgacaacgatcggaggaccgaaggagtaaccgctttttgcacaaca  
tgggggatcatgtaactgccttgatcgttgggaaccggagctgaatgaagccataccaaacgacgagcgtgacaccacgatg  
cctgtagcaatggcaacaacgttgcgcaactattaactggcgaactacttacttagcttccggcaacaattaatagactggat  
ggaggcggataaagtgcaggaccacttctgctcggccttccggctggtggtttattgctgataaatctggagccgggtgag  
cgtgggtctcgcggtatcattgcagcactggggccagatggttaagccctccgctatcgtatctacacgacggggagtcagg  
caactatggatgaacgaaatagacagatcgtgagataggtgcctcactgattaagcattggttaactgacagcaagttactcat  
atactattagattgattaaaacttattttaaataaaaggatctaggtgaagatccttttgataatctcatgacaaaatccctaac  
gtgagtttctgctcactgagcgtcagacccgtagaaaagatcaaggatcttcttgagatcctttttctgctgctaatctgctgct  
tgcaacaaaaaaaccaccgctaccagcgggtggtttgttgcggatcaagagctaccaactcttttccgaaggttaactggctc  
agcagagcgcagataccaaataactgtccttctagtgtagccgtagttaggccaccactcaagaactctgtagcaccgctacat  
acctcgtctgtaaatcctgttaccagtggtgctgcccagtgataagtcgtgtcttaccgggttgactcaagacgatagttac  
cggataaggcgcagcggctcgggtgaacggggggttctgtcacacagcccagcttgagcgaacgacctacaccgaactga  
gatacctacagcgtgagctatgagaaagcggcaccgcttccgaaggagaaaggcggacaggtatccggtaagcggcaggg  
tcggaacaggagagcgcaggggagcttccagggggaaacgcctggtatctttatagtcctgctgggtttcggccacctgact  
tgagcgtcagttttgtgatgctcgtcagggggggcggagcctatgaaaaacgccagcaacggccttttacggttctggcct  
tttctggtcctttgtcacatgttcttctcgttattcccctgattctgtggataaccgtattaccgctttgagtgagctgataccgct  
cgccgcagccgaacgaccgagcgcagcagctcagtgagcaggaagcggaaagagcggccaatacgcacaaccgctctcc  
ccgcgcttggccgattcattaatgcagctgtggaatgtgtcagttagggtgtggaaagtcccaggctcccagcaggcaga  
agtatgcaaagcatgcatctcaattagtcagcaaccaggtgtggaaagtcccaggctcccagcaggcagaagtatgcaaag  
catgcatctcaattagtcagcaaccatagtcggcccttaactccgcccataactccgcccactcggcccagttccgcccattct  
ccgccccatggtgactaattttttatattatgagagggccgaggccgctcggcctctgagctattccagaagtagtgaggaggc  
tttttggaggcctaggcttttgcaaaagctggacacaagacaggcttgcgagatagtttgagaataaccatttatcccgctca  
gggagagggcagtgctgtaaaaagacgggactcatgtgaaatactggttttagtgcgcccagatctctataatctcgcgcaacctat  
ttccccctgaacacttttaagccgtagataaacaggctgggacacttcacatgagcgaataacatcgtcacctgggacatggt  
gcagatccatgcacgtaaacgcgaagcggactgatgccttctgaacaatggaaaggcattattgcccgaagccgtggcggtctg

taccgggtgctgactggcgcgtgaactgggtattcgtcatgctgataccggttgtattccagctacgatcacgacaaccagcgcg  
agcttaaagtgctgaaacgcgcagaaggcgatggcgaaggcttcatcggtattgatgacctggggataccgggtgactgctggt  
tgcgattcgtgaaatgtatccaaaagcgcactttgtcaccatcttcgaaaaccggctggctgctccgctggtgatgactatgtgtt  
gatatcccgcaagatacctggattgaacagccgtgggataatggcgcgtattcgtcccgaatctccggctgctaattctttcaa  
cgcctggcactgcccggcgtgttcttttaactcaggcgggttacaatagttccagtaagtattctggaggctgcatccatgaca  
caggcaaacctgagcgaaacctgttcaaaccccgtttaaaccctgaaacctcgacgctagtcggccgctttaatcacggc  
gcacaaccgctgtgcagtcggcccttgatggtaaaaccatccctactggatcgcgatgattaaccgctgatgtggatctggcg  
cggcattgaccacgcgaaatcctcgcagtcaggcacgtattgtgatgagcgcgatccgaacgtaccgacgatgattatacga  
acgggtgattggctaccgtggcggcaactggattatgagtgggccccggatctttggaaggaaccttactctgtggtgtgacata  
attggacaaactacctacagagattaaagctctaaggtaaataaaaatttttaagtataatgtgtaaactactgattctaattgtt  
gtgtatttagattccaacctatggaactgatgaatgggagcagtggtggaatgccttaatgaggaaaacctgtttgctcagaaga  
aatgccatctagtgatgatgaggctactgctgactctcaacattctactcctcaaaaaagaagagaaaaggtagaagaccccaag  
gacttctcagaattgctaagttttgagtcagctgtgtgtttagtaatagaactctgtctgtttgctatttacaccacaaaggaaaa  
agctgactgctatacaagaaaattatggaaaaatattctgtaacctttataagtaggcataacagttataatcataactactgttttt  
cttactccacacaggcatagagtgtctgtatataactatgctcaaaaattgtgtaccttttagcttttaattgtaaaggggttaata  
aggaatatttgatgtatagtgcttactagagatcataatcagccataccacattgtagagggtttactgtttaaaaaacctcca  
cacctccccctgaacctgaaacataaaatgaatgcaattgtgtgttaactgtttattgcagcttataatggttacaataaagcaat  
agcatcacaatttcacaaataaagcatttttctactgcattctagttgtgtgttgcctcaaacctcatcaatgatcttatcatgctggt  
caactggataactcaagtaaccaaactatcccaactcccacccataccctattaccactgccaattacctagtggttctatt  
actctaaacctgtgattcctctgaattatttcttttaagaaattgtattgttaaatatgtactacaaacttagtagttggaagggctaa  
ttactcccaagaagacaagatattctgatctgtggtactaccacacacaaggctactcctgattagcagaactacacacca  
gggcccaggggtcagatattcactgacctttggatggtgctacaagctagtagcagttgagccagataaggtagaagaggccaat  
aaaggagagaacaccagctgttacacctgtgagcctgcatgggatggatgacccggagagagaagtgttagagtgagggtt  
gacagccgcttagcatttcatcagtgcccgagagctgcatccggagtagtcaagaactgctgatcagagcttctacaagg  
gacttccgctggggactttccagggagcgtggcctgggcccggactggggagtggcgagccctcagatctgcatataagca  
gctgcttttgcctgactgggtctctggttagaccagatctgagcctgggagctctctggctaactaggaacccactgcttaag  
cctcaataaagctgctttagtgctcaagtagtggtgcccgtctgtgtgactctgtaactagagatccctcagaccctttta  
gtcagtggtgaaaatctctagcagtgccgcccgaacagggacttgaaagcgaagggaaccagaggagctctctcagcgc  
ggactcggctgctgaagcgcgcacggcaagaggcggggcggcactgggtgagtagccaaaaattttgactagcggag  
gctagaaggagagagatgggtgagagcgcagtagtattaagcgggggagaattagatcgcgatgggaaaaaattcggttaagg  
ccaggggggaaagaaaaataaaatataaataatagtagtgggcaagcagggagctagaacgattcgcagtaattcctggcctg  
ttagaacatcagaaggctgtagacaaatactgggacagctacaacctccctcagacaggatcagaagaacttagatcattat  
ataatacagtagcaacctctattgtgtgcatcaaggatagagataaaagacaccaaggaagccttagacaagatagaggaag  
agcaaaaacaaagtaagaccaccgcacagcaagcggccggtgatcttcagacctggacgatataataggggacaattggag  
aagtgaattataataataaagtagtaaaaattgaaccattaggagtagcaccaccaaggcaagagaagagtggtgagag  
agaaaaagagcagtggaataggagctttgttcttgggtcttgggagcagcaggaagcactatggcgcagcgtcaatgac  
gctgacggtacaggccagacaattattgtctggtatagtgagcagcagaacaatttctgagggctattgaggcgaacagcat  
ctgttgaactcacagctctggggcatcaagcagctccaggcaagaatcctggctgtgaaagatacctaaaggatcaacagctc  
ctgggatttggggtgctctggaaaactcattgcaacctgctgtgccttggatgctagttggagtaataatctctggaacaga  
tttggatcacagcactggatggagtgggacagagaaattaacaattacacaagcttaatacactccttaattgaagaatcgcaa  
aaccagcaagaaaagaatgaacaagaattatggaattagataaatgggcaagtttgggaattggttaacataacaaattggct  
gtggtatataaaattattcataatgatagtaggaggttggtaggttaagaatagttttgctgtactttctatagtaatagagttaggc  
agggatattcaccattatcgttccagaccacctccaaccccgaggggacccgacaggcccgaaggaatagaagaagaagg  
tgagagagagacagagacagatccattcgattagtagaacggatctcagcgggATcgccaaatggcagttatccacaatttt  
aaaagaaaaggggggattgggggtacagtcaggggaaagaatagtagacataatagcaacagacatacaactaaagaat  
tacaacaaacaaattacaacaaattcaaaatttccgggttattacagggacagcagagatccagttggatcgataagcttgatcga  
attcctgcagccccgataaaataaaagattttatttagtctccagaaaaaggggggaatgaaagacccacctgtaggttggcaa  
gctagctgcagtaacgccattttgcaaggcatggaaaaataccaaccaagaatagagaagttcagatcaagggcgggtacat  
gaaaatagtaacgttggccaaacaggatattcgcgggtgagcagtttccggccccggccccgggccaagaacagatggtcac  
cgcagtttccggccccggccccgaggccaagaacagatggtccccagatattggccaacccctcagcagtttctaagacctca  
gatgttccaggctcccccaaggacctgaaatgacctgctgcttatttgaattaaccaatcagcctgcttctgcttctgttccgc  
gcttctgcttcccagctctataaaagagctcacaaccctcactcggcgcgcagtcctccgacagactgagtcgccccggg  
gggatctggagctctcgagaattctcACGCGTGCCGGTACCATGTTGGATCCAATGCCTGAGCCAGCCA  
AGTCTGCTCCCGCCCCGAAGAAGGGCTCCAAGAAGGCAGTGACCAAAGCGCAGAAGAAGA

TGGCAAGAAGCGCAAGCGCAGCCGCAAGGAGAGTTACTCTGTGTACGTGTACAAGGTGCTGA  
AACAGGTCCATCCCGACACTGGCATCTCTTCCAAGGCCATGGGCATCATGAATCTTTTCGTTAA  
CGACATATTTGAGCGCATCGCGGGCGAGGCTTCCCGCCTGGCGCATTACAACAAGCGCTCGA  
CCATCACCTCCAGGGAGATCCAGACGGCCGTGCGCCTGCTGCTTCCCGGAGAGCTGGCCAA  
GCACGCCGTGTCGGAGGGCACCAAGGCCGTCACCAAGTACACCAGCTCCAAGGGTGGAGG  
TGGAAGCGGTgtgagcaagggcgaggagctgtcaccggggtggtgccatcctggctgagctggacggcgacgtaaa  
cggccacaagttcagcgtgtccggcgagggcgagggcgatgccacctacggcaagctgacctgaagttcatctgcaccacc  
ggcaagctgcccgtgccctggcccaccctcgtgaccaccctgacctacggcgtgcagtgttcagccgctaccccgaccacat  
gaagcagcagcacttctcaagtccgccatgccgaaggctacgtccaggagcgcaccatcttctcaaggacgacggcaact  
acaagaccgcgccgaggtgaagttcgagggcgacaccctggtgaaccgcatcgagctgaagggcatcgactcaaggagg  
acggcaacatcctggggcacaagctggagtacaactacaacagccacaacgtctatatcatggccgacaagcagaagaacg  
gcatcaagtgaaactcaagatccgccacaacatcgaggacggcagcgtgcagctcggcaccactaccagcagaacacc  
ccatcggcgacggccccgtgctgctgccgacaaccactacctgagcaccagccaagctgagcaagaccccaacgaga  
agcgcgatcacatggtcctgctggagttcgtgaccgcccgggatcactctcggcatggacgagctgtacaagGGTGGAG  
GTCGGACCGAAGAGTACAAGCTTATCCTGAACGGTAAAACCCTGAAAGGTGAAACCACCACC  
GAAGCTGTTGACGCTGCTACCGCGGAAAAAGTTTTCAAACAGTACGCTAACGACAACGGTGT  
GACGGTGAATGGACCTACGACGACGCTACCAAAACCTTACGGTAACCGAATAAACTAGTTAA  
GCGGCCGCGactctagagctgaccctttaagaccaatgacttacaaggcagctgtagatcttagccactttttaaagaaaa  
gggggactggaagggctaattcactcccaacgaagacaagatctgttttctgtactgggtctctctggttagaccagatctga  
gcctgggagctctctgtaactagggaaaccactgcttaagcctcaataaagctgccttgagtgttcaagtagtgtgcccgt  
ctgtgtgactctgtaactagagatccctcagacccttttagtcagtgtgaaaaatctctagcagcatctaga

mIFP-NLS

attaattccgtgtattctatagtgacctaataatcgatgtgtatgatacataaggttatgtattaattgtagccggttctaacgacaata  
tgtacaagcctaattgtgtagcatctggcttactgaagcagaccctatcatctctcgtaaactgccgcagagctgggttggtgg  
acgaaccttctgagttctggtaacggcgtcccgcaaccggaaatggcagcgaaccaatcagcaggggtcatcgctagccagat  
cctctacgccggacgcatcgtggccggcatcaccggcgccacaggtgcggttctggcgcctatatcgccgacatcaccgatg  
gggaagatcgggctcggcacttgggctcatgagcgttgtttcggcgtgggtatggtggcaggccccgtggccgggggactgt  
tgggcgccatctcctgcatgaccattcctgcgggcggggtgctcaacggcctcaacctactactgggtgcttctaagtacg  
gagtcgcataagggagagcgtcgaatggcactctcagtaaatctagctctgatgccgcatagtaagccagccccgacacc  
cgccaacaccgctgacgcgccctgacgggcttctgctcccggcatccgcttacagacaagctgtgaccgtctccgggagc  
tgcagtgtcagaggtttaccgctcatcaccgaaacgcgcgagacgaaagggcctcgtgatacgcctattttataggttaatgct  
atgataataatggttcttagacgtcaggtggcacttttcggggaaatgctgcggaaccctattgttttttctaatacattcaa  
atatgtatccgctcatgagacaataaccctgataaatgctcaataatgaaaaaggaagagatgagattcaacatttccgtgt  
cgccctattcccttttgcggcattttgcttctgttttgcaccagaaacgctggtgaaagtaaaagatgctgaagatcagtt  
gggtgcagagtggttacatcgaactggatctcaacagcggtaagatccttgagagtttcgccccgaagaacgtttccaatga  
tgagcacttttaagttctgctatgtggcgggtattatccgattgacgcccggcaagagcaactcgctcggcgatacactatt  
ctcagaatgacttggtgagactcaccagtcacagaaaagcatcttacggatggcatgacagtaagagaattatgagtgctgccc  
ataaccatgagtgataaactgcccgaacttactctgacaacgatcggaggaccgaaggagtaaccgctttttgcacaaca  
tgggggatcatgtaactcgccttgatcgttgggaaccggagctgaatgaagccataccaaacgacgagcgtgacaccacgatg  
cctgtagcaatggcaacaacgttgcgcaactattaactggcgaactactactctagcttcccggcaacaattaatagactggat  
ggaggcggataaagttgcaggaccacttctgcgctcggccctccggctggctggtttattgctgataaatctggagccgggtgag  
cgtgggtctcggggtatcattgcagcactggggccagatggttaagccctcccgtatcgtagttatctacacgacggggagtcagg  
caactatggatgaacgaaatagacagatcgctgagataggtgcctcactgattaagcattggttaactgacagcaagtttactcat  
atatacttagattgattaaaacttatttttaattaaaaggatctaggtgaagatccttttgataatctcatgaccaaataccctaac  
gtgagtttctgctcactgagcgtcagacccgtagaaaagatcaaggatcttctgagatcctttttctgcgctgaatctgctgct  
tgcaaacaaaaaaaccaccgctaccagcgggtggtttgttgcggatcaagagctaccaactcttttccgaaggttaactggctc  
agcagagcgcagataccaaataactgtccttctagtgtagccgtagttaggccaccactcaagaactctgtagcaccgctacat  
acctcgtctgtaactcctgttaccagtggtgctgcccagtgccgataagtcgtgtcttaccgggttgactcaagacgatagttac  
cggataagggcagcgggtcgggtgaacggggggttctgctcacacagcccagcttgagcgaacgacactacaccgaactga  
gatacctacagcgtgagctatgagaaagcggcaccgctcccgaagggagaaagggcggacaggtatccggtaagcggcaggg  
tcggaacaggagagcgcaggggagcttccaggggaaacgcctggtatctttatagtcctgctgggtttcggccacctgact  
tgagcgtcagttttgtgatgctcgtcagggggcgagcctatgaaaaacgcccagcaacgccccttttaccggttctggcct  
tttctggtctttgctcacatgttcttctcgttaccctgattctgtggataaccgtattaccgctttgagtgagctgataccgct



tacaaaaacaaattacaaaaattcaaaatctcggggtttattacagggacagcagagatccagtttggatcgataagcttgatatcga  
attcctgcagccccgataaaataaaagatcttatttagtctccagaaaaaggggggaatgaaagaccccacctgtaggttggcaa  
gctagctgcagtaacgccatcttgaagggcatggaaaaataccaaccaagaatagagaagttcagatcaagggcgggtacat  
gaaaatagctaacgttgggccaacaggatatctgcgggtgagcagtttcggccccggccccggggccaagaacagatggtcac  
cgcagtttcggccccggccccgaggccaagaacagatggtccccagatatggccaaccctcagcagtttctaagacccatca  
gatgttccaggctcccccaaggacctgaaatgaccctgcgccttattgaattaaccaatcagcctgcttctcgttctgttcgcg  
gcttctgctccccgagctctataaaagagctcacaaccctcactcggcgcgcagtcctccgacagactgagtcgccccggg  
gggatctggagctctcgagaattctcACGCGTGCCGGTACCATGTCCGGTACCGCTGACTACCTCAGCATT  
CGGCCACGCGTTTCTGGCTAACTGTGAACGCGAGCAGATCCACCTGGCGGGCTCCATTGAG  
CCGCACGGTATCCTGCTGGCTGTGAAAGAGCCGGACAACGTGGTGATCCAGGCTTCTATTAAC  
GCTGCGGAGTTCCTGAACACCAACTCTGTTGTTGGCCGTCCGCTGCGTGACCTGGGCGGCG  
ATCTGCCTTTGCAGATCCTGCCGCACCTGAACGGCCCGCTGCACCTGGCTCCGATGACCCTG  
CGTTGTACCGTGGGTTCTCCGCCGCGTCGTGTGGACTGTACCATTTCATCGTCCGTCTAACGGC  
GGCCTGATCGTAGAACTGGAACCAGCAACCAAGACCACTAACATTGCGCCGGCTCTGGACGG  
TGCGTTTTTCATCGTATCACTTCTTCATCCTCCCTGATGGGCCTGTGTGACGAAACCGCGACTATT  
ATCCGTGAGATTACTGGCTACGACCGTGTGATGGTAGTACGTTTCGATGAAGAGGGTAATGGCG  
AAATTCTGTCCGAACGTCGTCGTGCGGACCTGGAAGCGTTCCTGGGTAACCGCTACCCGGCG  
TCTACTATTCCGCAGATCGCTCGTCGCCTGTACGAACATAACCGTGTTCCGCTGCTGGTAGATG  
TGAACATACTCCGGTTCGGCTACAGCCGCGCATCAGCCCGCTGAACGGTCGTGATCTGGATA  
TGTCCCTGTCTTGCTGCGCTCTATGTCCCCGATCCACCAGAAATACATGCAGGACATGGGCG  
TTGGCGCGACCCTGGTTTGCTCTCTGATGGTGTCTGGTTCGTCTGTGGGGTCTGATCGCTTGC  
CACCCTACGAACCGCGCTTCGTTCCGTTCCACATTCGCGCTGCTGGCGAAGCGCTGGCGG  
AACTTGTGCGATCCGCATCGCGACGCTGGAGAGCTTTGCACAGTCTCAGTCCAAAGGTGGA  
GGTCGGACCGAAGAGTACAAGCTTATCCTGAACGGTAAAACCCTGAAAGGTGAAACCACCAC  
CGAAGCTGTTGACGCTGCTACCGCGGAAAAAGTTTTCAAACAGTACGCTAACGACAACGGTGT  
TGACGGTGAATGGACCTACGACGACGCTACCAAAACCTTCACGGTAACCGAAGGTGGTGGTA  
GCGGTGGTGGTACTAGTCCAAAAACAAGGAGGAGACCGCGAAGATCACAACGGAAAAGGCC  
GCCTACGCCATGGCCGCATATGTAAGCGGCCGcactctagagtcgacccttaagaccaatgacttacaagg  
cagctgtagatcttagccacttttaaaagaaaaggggggactggaagggtaattcactccaacgaagacaagatctgctttt  
gcttgactgggtctctctggttagaccagatctgagcctgggagctctctggctaactaggggaaccctgcttaagcctcaataa  
agcttgacctgagtgctcaagtagtgtgtgcccgtctgtgtgtgactctgtaactagagatccctcagacccttttagtcagtg  
gaaaatctctagcagcatctaga
