# Supplementary material for: High-content imaging-based pooled CRISPR screens in mammalian cells
Source: PubMed Central journal article supplement (PMC7821101; doi:10.1083/jcb.202008158), 2021-01-19
Supplement: JCB_202008158_DataS8.pdf [file JCB_202008158_DataS8.pdf]

**Supplementary file 12: qPCR primers used in the study**

| <b>Targeted gene</b> | <b>Forward primer</b>    | <b>Reverse primer</b>   |
|----------------------|--------------------------|-------------------------|
| <b>CASP8AP2</b>      | CACTTGCCACTTCTACAAGTC    | TGGCGGCTAAATATGCAAATG   |
| <b>AURKB</b>         | TGGAAACGTGTACTTGGCTC     | AGGATGTTGGGATGGTGC      |
| <b>RAD51</b>         | GTGGTAGCTCAAGTGGATGG     | GGGAGAGTCGTAGATTTTGCAG  |
| <b>TACC3</b>         | CCTCTTCAAGCGTTTTGAGAAAC  | GCCCTCCTGGGTGATCCTT     |
| <b>INCENP</b>        | GAGAGGCTCCTGAATGTTGAG    | AATCTCCGTGTCATTGTGGG    |
| <b>TICRR</b>         | AGCAGGTGATGGAGAAGTTG     | AAACAGTCCAGTATCCAAGGTG  |
| <b>TOP2A</b>         | CCTTTGCCAATGCTTCCAAGTTAC | GTGTCTTCTCGGTGCCATTCAAC |
| <b>CDCA8</b>         | TTGACTACTTCGCCCTTG       | CTTCTTCTCCTCTTCCACTA    |
| <b>FBXO5</b>         | GTGTCTAAAGTGAGCACAACCTG  | TTCTCTGGTTGAAGCATGAGG   |
| <b>KIF11</b>         | TATTGAATGGGCGCTAGCTT     | TCGTCTGCGAAGAAGAAAGA    |
| <b>SPDL1</b>         | GTTTGAGCTGCGAATGTGAAG    | GCCTGGCTTCATCTAATTCCAC  |
| <b>SKA1</b>          | AGTTGAAGAACCTGAACCCG     | GGTTAAGCGGGATTTTCATGTAC |
| <b>DNA2</b>          | GCCGCTGGAACCTTAAACTG     | GTACATCTGACCAGTCTTGAGG  |
| <b>NUP62</b>         | CTGAATCAAGGTCCAGAGAAGG   | GTGCCTCCAAAATTAACCCG    |
| <b>KRI1</b>          | AAGCCTTGGAGAAGCAGAAG     | CTGGAGTCTGTGATTGGAAGTC  |
| <b>ACTB</b>          | GCTACGAGCTGCCTGACG       | GGCTGGAAGAGTGCCTCA      |
